1           **Syndecan-1 is overexpressed in human thoracic aneurysm but is**  
2           **dispensable for the disease progression in vivo**

3  
4           Sara Zalgout,<sup>1,2,3</sup> Sophie Vo,<sup>1,4</sup> Véronique Arocas,<sup>1,5</sup> Soumaya Jadoui,<sup>1,4</sup> Eva Hamade,<sup>3</sup> Bassam  
5           Badran,<sup>3</sup> Olivier Oudar,<sup>4</sup> Nathalie Charnaux,<sup>4</sup> Yacine Boulaftali,<sup>1,5</sup> Marie-Christine Bouton<sup>1,5</sup> and  
6           Benjamin Richard<sup>1,4\*</sup>

7           1 LVTS, INSERM, U1148, Paris, France

8           2 Université Sorbonne Paris Nord, Villetaneuse, France.

9           3 Laboratory of Cancer Biology and Molecular Immunology, Faculty of Sciences-I, Lebanese University,  
10           Hadath, Beirut, Lebanon.

11           4 Université Sorbonne Paris Nord, Bobigny, France.

12           5 Université de Paris, Paris, France.

13           \* **Correspondance:**

14           Benjamin RICHARD

15           [benjamin.richard@inserm.fr](mailto:benjamin.richard@inserm.fr)

16           **Keywords: Syndecan-1, aneurysm, proteoglycans, extracellular matrix, smooth muscle cell (SMC)**

17  
18           **Number of words: 3667**

19           **Total number of figures and tables: 5 (excluding supplementary material)**

Zalghout et al.

20 **ABSTRACT**

21 Glycosaminoglycans (GAGs) pooling has been considered since long as one of the  
22 histopathological characteristics defining thoracic aortic aneurysm (TAA) together with smooth  
23 muscle cells (SMCs) apoptosis and elastin fibers degradation. However, few information is  
24 provided about GAGs composition or potential implication in TAA pathology. Syndecan-1 (Sdc-  
25 1) is a heparan sulfate proteoglycan that is implicated in extracellular matrix (ECM) interaction  
26 and assembly, regulation of SMCs phenotype and various aspects of inflammation in the  
27 vascular wall. In the current work, the regulation of Sdc-1 protein was examined in human TAA  
28 by ELISA and immunohistochemistry. In addition, the role of Sdc-1 was evaluated in descending  
29 TAA in vivo using a mouse model combining both aortic wall weakening and hypertension. Our  
30 results showed that Sdc-1 protein is over expressed in human TAA aortas compared to healthy  
31 counterparts and that SMCs are the major cell type expressing Sdc-1. Similarly, in the mouse  
32 model used, Sdc-1 expression was increased in TAA aortas compared to healthy samples.  
33 Although its protective role against abdominal aneurysm has been reported, we observed that  
34 Sdc-1 was dispensable for TAA prevalence or rupture. In addition, Sdc-1 deficiency did not alter  
35 the extent of aortic wall dilatation, elastin degradation, collagen deposition, or leukocyte  
36 recruitment in our TAA model. These findings suggest that Sdc-1 could be a biomarker revealing  
37 TAA pathology. Future investigations could uncover the underlying mechanisms leading to Sdc-  
38 1 expression alteration in TAA.

Zalghout et al.

## 39 INTRODUCTION

40 The mortality rate due to thoracic aortic aneurysm (TAA) rupture is in considerable increase and  
41 the efficiency of current drug therapies is yet limited and controversial (1–3).  
42 Glycosaminoglycans (GAGs) pooling has been considered since long as one of the  
43 histopathological characteristics defining TAAs, together with smooth muscle cells (SMCs)  
44 apoptosis or loss of contractility and elastin fibers degradation of (4–6). However, the identity of  
45 the accumulated GAGs in TAA and their potential involvement in the disease are poorly studied.  
46 A better understanding of the molecular changes occurring in TAA pathophysiology may open  
47 up new avenues for its treatment.

48 Even though proteoglycans (PGs; i.e. core protein with attached GAGs) occupy 1 to 5% mass  
49 fraction of a healthy arterial wall, they are crucial contributors to the aortic structural integrity  
50 and functioning and in particular to its mechanical homeostasis (7). PGs accumulation may exert  
51 a swelling pressure on the elastic laminae resulting in their separation and a consequent  
52 modification of the wall mechanical properties giving rise to a weakened wall and participating  
53 in TAA dissections and ruptures (7,8). Recently, it has been reported that aggrecan and versican,  
54 two chondroitin sulfate PGs, accumulate in regions of medial degeneration in ascending TAAs  
55 and dissections and may contribute to extracellular matrix (ECM) disruption (9). In addition, the  
56 levels of heparan and chondroitin sulfate PGs are increased after vascular injury and in dissected  
57 aortas (10–12).

58 Syndecan-1 (Sdc-1), a transmembrane heparan sulfate PG, is involved in various aspects of  
59 inflammatory diseases (13–15), wound healing (16), and ECM interaction or assembly (17,18).  
60 Sdc-1 has been shown to maintain a differentiated (19) and a contractile state of SMCs (12). In  
61 addition, it mediates cell-cell and cell-matrix interactions by acting as a co-receptor for binding

Zalghout et al.

62 to ECM molecules or growth factors such as fibronectin or VEGF, respectively (20,21).  
63 Therefore, Sdc-1 is hypothesized to play a role in the development of aortic wall pathologies.

64 Sdc-1 has indeed been shown, in two mice models of abdominal aortic aneurysm (AAA) in  
65 which aneurysm was induced by elastase or angiotensin II (Ang II) infusion (on Apo E deficient  
66 background) (22), to exert a protective role against AAA development by attenuating the  
67 inflammatory response and reducing protease activity (22). In contrast, no data are available  
68 regarding its role in TAA development.

69 In the current study, we investigated Sdc-1 expression in the aortic wall of patients with TAA  
70 arising from different etiologies. We also examined the disease progression and characteristics  
71 by the use of an aneurysm mouse model generated by the combination of aortic wall weakness  
72 and hypertension in Sdc-1<sup>+/+</sup> or Sdc-1<sup>-/-</sup> on C57Bl/6J background.

73

## 74 **MATERIALS AND METHODS**

75

### 76 **Human samples**

77 Twenty-five human ascending TAA samples were obtained from patients at the time of  
78 prophylactic surgical repair and eleven healthy thoracic aortic tissues were obtained from  
79 anonymous deceased organ donors under the authorization of the French Biomedicine Agency  
80 (PFS 09-007). Data relative to these patients are stated in Supplementary Table 1. Aortic  
81 preparation involved direct paraformaldehyde fixation for histological studies or immediate  
82 macroscopic dissection to separate the distinct aortic layers (intima, media, adventitia) followed  
83 by direct freezing for q-PCR and ELISA analysis.

Zalghout et al.

## 84 **Quantification of mRNA and protein levels of Sdc-1 in human samples**

85 Frozen media tissues from healthy or TAA aortas were pulverized using liquid nitrogen freezer  
86 mill (6870 SPEX Certiprep 6750). Protein extraction was done by powder lysis in RIPA buffer  
87 (5mg/ml). Sdc-1 media protein level was assessed using ELISA (R & D systems, DY2780)  
88 according to the manufacturer's instructions. For RNA extraction, 50 to 100 mg of powder were  
89 homogenized in Trizol Reagent (Invitrogen). Total RNA was extracted using RNeasy extraction  
90 kit (Qiagen) and 1 µg was reverse transcribed with RT Maxima First Strand kit (K1642, Thermo  
91 Scientific). The q-PCR was performed on cDNA using Light Cycler (Roche). Levels of mRNA  
92 were normalized to hypoxanthine guanine phosphoribosyl transferase (HPRT). Sequences of  
93 primers are listed in table 1. Fold changes of gene expression were calculated using  $\Delta\Delta CT$   
94 method.

95

### 96 **Table 1: Primers used for quantitative polymerase chain reaction (qPCR; human samples)**

| Gene  | Forward Primer Sequence (5'-3') | Reverse Primer Sequence (3'-5') |
|-------|---------------------------------|---------------------------------|
| HPRT1 | AGTTGAGAGATCATCTCCAC            | TTGCTGACCTGCTGGATTAC            |
| SDC1  | TGTACCGCATGAAGAAGAAGG           | GTTTGGTGGGCTTCTGGTAG            |

97

## 98 **Histology and immunostaining**

99 For histological studies, human and murine fixed aortic tissues were embedded in paraffin, and  
100 sectioned into 7 µm thick sections. Antigen retrieval was done by heating the sections in a water  
101 bath at 95°C for 30 min in a Dako Target Retrieval Solution, pH 9 (code S236). Sections were

Zalghout et al.

102 permeabilized by 0.1% Triton-X 100 for 5 min. For DAB IHC endogenous peroxidase activity  
103 was blocked by 3% H<sub>2</sub>O<sub>2</sub> for 30 min. Blocking was performed with DAKO<sup>®</sup> protein block-  
104 serum free (code # X0909) for 1 h at room temperature. Sections were incubated overnight at  
105 4°C with primary antibodies (Supplementary Table 2).

106 For DAB IHC, slides were washed with PBS and treated 1 h at room temperature with LSAB2  
107 System, HRP kit for human, and Peroxidase AffiniPure donkey anti-rat secondary antibody for  
108 mice samples (Supplementary Table 2). 3'-diaminobenzidine tetra-hydrochloride chromogen  
109 (DAB, K3468, Dako) was added to all sections and the reaction was stopped with distilled water.  
110 Counterstaining was done with hematoxylin (for mice IHC). Slides were then mounted with  
111 Eukitt<sup>®</sup> mounting media.

112 For immunofluorescence, following primary antibody incubation, sections were treated with  
113 adequate secondary antibodies (Supplementary Table 2) for 2 h at room temperature. Nuclei  
114 were then stained with DAPI aqueous fluoroshield mounting media (Abcam, ab104139).  $\alpha$ -  
115 SMA, CD45 and ly6-G markers were used to identify SMCs, leukocytes and neutrophils,  
116 respectively.

117 Elastin laminae degradation of mice aortas was blind-scored after orcein (Sigma-Aldrich)  
118 staining, using an ascending scale from 0 to 4 (no degradation to maximal degradation). Collagen  
119 deposition was detected with Sirius red (RAL Diagnostics) staining, and its quantification was  
120 assessed by image J software after exposing the slides to polarized light (Leica microsystems,  
121 DMI8).

122 **Animals and experimental procedures**

Zalghout et al.

123 Sdc-1<sup>-/-</sup> mice were a kind gift from Dr. Pyong Woo Park (Harvard Medical School, Boston) and  
124 have been backcrossed for at least 10 generations on a C57BL/6J background.

125 Three week old Sdc-1<sup>+/+</sup> and Sdc-1<sup>-/-</sup> mice were divided into three groups: (group 1) control  
126 group with no treatment (mice were sacrificed at 8 weeks of age), (groups 2 & 3) treated groups  
127 including mice receiving daily intraperitoneal injection of 150 mg/kg/day of  $\beta$ -  
128 aminopropionitrile fumarate (BAPN, A3134; Sigma Aldrich) for 28 days, then infused  
129 subcutaneously with 1  $\mu$ g/kg/min of angiotensin II (Ang II, A9525, Sigma Aldrich) during 3  
130 (group 2) or 28 days (group 3) using mini-osmotic pumps (Alzet 2004) (Figure 2A). At the end  
131 of the protocol, mice were anesthetized and sacrificed. Aortas were harvested and rinsed with  
132 saline to remove blood. Aortas were cleaned from the surrounding connective and adipose  
133 tissues, fixed in 10% formalin for 24 h at 4°C, and stored in 70% ethanol for further  
134 investigations. Necropsy was done for mice that died during the course of the experiment and the  
135 site of rupture (thoracic or abdominal) was determined based on macroscopic view of  
136 hemorrhage location. Aneurysm (TAA or AAA) was defined as 50% increase in the mean aortic  
137 diameter compared to the same healthy aortic segment from non-treated mice (please check  
138 below quantification section).

### 139 **Blood pressure measurement**

140 Mice blood pressure was measured non-invasively before pump implantation and up to 5 days  
141 post-implantation, using the tail cuff system (BP-2000 SERIES II, Blood Pressure Analysis  
142 System <sup>TM</sup>, Visitech Systems). Mice were habituated for a minimum of 5 consecutive days  
143 before the recording were considered.

### 144 **Measurement of aortic diameter**

Zalghout et al.

145 For morphometric analysis, images were taken by an EF-S 60 mm macro lens mounted on a  
146 DSLR camera (Canon EOS600D), and used to measure the outer diameter of the early  
147 descending thoracic aorta using Image J software. The diameter was determined at the site of  
148 dilatation from the average of a minimum of 3 different measurements of the posterior and  
149 inferior sides.

## 150 **Statistical analysis**

151 Values are shown as percentage or mean  $\pm$  standard error of the mean (SEM). Statistical analysis  
152 was performed using Prism GraphPad. The non-parametric Mann-Whitney test was used to  
153 compare two groups when data did not display a normal distribution. Fischer's exact test was  
154 used when comparing two categorical variables. P values less than 0.05 were considered  
155 significant.

156

## 157 **RESULTS**

### 158 **Sdc-1 protein expression is increased in the aortic media of patients with TAA and is** 159 **expressed by SMCs**

160 The expression of Sdc-1 at the mRNA and protein levels was investigated in human healthy or  
161 TAA medial layer. Similar levels of *SDC1* mRNA were observed between the different samples  
162 (Figure 1A). In contrast, a significantly higher protein level of Sdc-1 was revealed by ELISA in  
163 TAA compared with healthy human aortic media (Figure 1B). This difference was confirmed by  
164 IHC (Figure 1C). Immunofluorescence results showed a co-localization between Sdc-1 and  $\alpha$ -  
165 SMA, indicating that most of Sdc-1 is expressed by SMCs in human healthy and TAA aortas  
166 (Figure 1D).



Zalghout et al.

167 Altogether, these data illustrate that Sdc-1 is more expressed at the protein level in TAA aortas  
168 compared to healthy counterparts and SMCs are a type of cells overexpressing Sdc-1 in TAA  
169 aortas.

170

### 171 **Sdc-1 is overexpressed in the TAA developed in the BAPN/Ang II aneurysm mouse model**

172 The role of Sdc-1 on TAA development was investigated in an animal model using BAPN and  
173 Ang II known to induce aortic aneurysms in C57Bl/6J mice (23). In the present model, 3-weeks-  
174 old Sdc-1<sup>+/+</sup> or Sdc-1<sup>-/-</sup> male mice received intraperitoneal injection of BAPN for 4 weeks and  
175 then subcutaneous infusion of Ang II by pump implantation. Mice received Ang II for 3 or 28  
176 days to mimic early and late stages of TAA development (Figures 2A). The effect of Ang II on  
177 hypertension was confirmed by the significant increase in systolic blood pressure measured after  
178 implantation, with no difference between Sdc-1<sup>+/+</sup> and Sdc-1<sup>-/-</sup> mice (data not shown). The use  
179 of this Ang II/BAPN model did not generate aneurysm in all studied animals (discussed in the  
180 following section). Analysis of Sdc-1 expression by IHC, revealed that Sdc-1 protein was  
181 elevated in TAA compared to healthy aortas after both 3 and 28 days of Ang II treatment (Figure  
182 2B). Sdc-1 expression was specific for the TAA development as Sdc-1 was not detected in aortas  
183 treated only with BAPN or with both BAPN and Ang II (at both time points) and that did not  
184 develop aneurysm (Supplementary Figure 1). Therefore, in accordance with human sample data,  
185 Sdc-1 expression is increased in the TAA generated in this mouse model.

186

### 187 **Sdc-1 is dispensable for TAA development and displays a potential protective role against**

188 **AAA development in mice**

Zalghout et al.

189 The survival rate of Sdc-1<sup>+/+</sup> and Sdc-1<sup>-/-</sup> mice was similar during the course of Ang II infusion  
190 (Figures 3A), indicating that Sdc-1 deficiency did not alter the viability of the mice that  
191 developed aneurysm.

192 As this model is known to induce both thoracic and abdominal aneurysms, TAA and AAA  
193 incidence were compared in Sdc-1<sup>+/+</sup> and Sdc-1<sup>-/-</sup> mice. After 3 days of Ang II infusion, the  
194 proportions of the developed aneurysms were as follow for Sdc-1<sup>+/+</sup> and Sdc-1<sup>-/-</sup> mice  
195 respectively: TAA (40% vs 35%), AAA (20% vs 6%), both TAA and AAA (0% vs 6%) (Figure  
196 3B). These results did not reveal any significant implication of Sdc-1 in aneurysm incidence in  
197 this mouse model after 3 days of Ang II treatment.

198 When analyzing aneurysm incidence after 28 days of Ang II treatment, 73% of Sdc-1<sup>+/+</sup> mice  
199 developed TAA vs 52% in Sdc-1<sup>-/-</sup> mice. Moreover, 8% of Sdc-1<sup>-/-</sup> developed AAA whereas  
200 none of Sdc-1<sup>+/+</sup> mice did (Figure 3C). Sdc-1<sup>-/-</sup> mice showed a higher tendency for AAA  
201 occurrence, alone or in combination with TAA compared to Sdc-1<sup>+/+</sup> mice, with 6 /26 AAA in  
202 Sdc-1<sup>-/-</sup> mice compared to 0/15 AAA in Sdc-1<sup>+/+</sup> mice (Figure 3D). These data are in accordance  
203 with a previous study reporting a protective effect of Sdc-1 against AAA development in a mice  
204 model of AAA (22).

205

206 **Sdc-1 deficiency does not alter the extent of aortic dilatation, ECM remodeling, or**  
207 **leukocytes recruitment in descending TAA in mice**

208 The observation that Sdc-1 was not involved in TAA incidence does not rule out the possibility  
209 that it could affect the extent of thoracic aortic dilatation or the morphology of the developed  
210 TAA.

Zalghout et al.

211 Aortas harvested at 3 or 28 days from surviving animals were photographed (Figure 4A) and  
212 their external diameters were measured. There was no difference in the descending thoracic  
213 diameter between Sdc-1<sup>+/+</sup> and Sdc-1<sup>-/-</sup> aortas at both time points (Figure 4B). More specifically,  
214 we did not observe any difference in diameter between Sdc-1<sup>+/+</sup> and Sdc-1<sup>-/-</sup> aortas that displayed  
215 TAA, 28 days after pump implantation (data not shown).

216 The ECM remodeling of the developed Sdc-1<sup>+/+</sup> or Sdc-1<sup>-/-</sup> TAA was investigated by assessing  
217 the level of elastic degradation and collagen deposition by orcein and Sirius red staining,  
218 respectively. Similar levels of elastin degradation (Figure 4C) or collagen deposition (Figure 4D)  
219 were observed for Sdc-1<sup>+/+</sup> and Sdc-1<sup>-/-</sup> aortas with TAA.

220 Increasing evidence support a role of inflammation or immune cells infiltration in human TAA  
221 (reviewed in (24)) and TAA mice models are often associated with inflammation (25,26). In  
222 addition, Sdc-1 is involved in various aspects of inflammation such as leukocyte recruitment (27)  
223 or its resolution (28). Therefore, leukocyte and more specifically neutrophil recruitment were  
224 analyzed in Sdc-1<sup>+/+</sup> or Sdc-1<sup>-/-</sup> TAA aortas after 3 (Supplementary Figure 2A) or 28 days  
225 (Figure 4E, Supplementary Figure 2B) of Ang II infusion.

226 Massive recruitment of leukocytes (CD45 staining) and neutrophils (Ly-6G staining) in TAA  
227 was observed in a similar manner in both Sdc-1<sup>+/+</sup> and Sdc-1<sup>-/-</sup> mice following 3 days of Ang II  
228 infusion (Supplementary Figure 2A). Leukocytes and neutrophils were distributed nearly all over  
229 the aorta but sparsely in the intact media. These cells were mainly observed in the adventitia or at  
230 the border of the false channel and to a less extent in the dissected media part (media around  
231 false channel) (Supplementary Figure 2A). Less leukocyte infiltration was detected after 28 days  
232 of Ang II treatment compared to 3 days, with still no difference between Sdc-1<sup>+/+</sup> and Sdc-1<sup>-/-</sup>

Zalghout et al.

233 mice (Figure 4E, Supplementary Figure 2B). Moreover, very few neutrophils were observed in  
234 the TAA formed in both Sdc-1<sup>+/+</sup> and Sdc-1<sup>-/-</sup> mice at this time point (Supplementary Figure 2B).  
235 Taken together, these results indicate that Sdc-1 has no effect on the extent of aortic dilatation,  
236 elastin degradation nor collagen deposition in descending TAA in mice. In addition, Sdc-1 does  
237 not participate in leukocytes (and neutrophils) recruitment in descending TAA in this mouse  
238 model.

## 239 **DISCUSSION**

240 Previous studies suggested that Sdc-1 could be an important player in TAA development as it is  
241 involved in ECM assembly and organization (18), SMCs phenotype regulation and  
242 mechanosensing (19). RNA level of Sdc-1 (referred previously as syndecan) was previously  
243 reported to be increased after vascular injury (29). More recently , an increase of Sdc-1 protein  
244 level was observed in the adventitia of human aortas with ascending TAA (30).

245 In the current study, we report for the first time, by ELISA and histological analysis, that Sdc-1  
246 is one of the members of the PGs overexpressed in human TAA aorta medial layer. Our  
247 immunofluorescence analysis showed that Sdc-1 expression is increased not only in media layer,  
248 but also in the intima and adventitia layers, in agreement with Ntika et al (30).

249 Our results also indicate that SMCs are the major cell type expressing Sdc-1 in human TAA  
250 aortas, which is in line with an *in vitro* study showing that mechanical stress induces the  
251 expression of Sdc-1 by SMCs (31). This suggests that the altered wall mechanics in TAA aortas  
252 induce Sdc-1 expression on SMCs. BAPN and Ang II infusion induce vascular remodeling (32),  
253 TAA, AAA (23), and thoracic aortic dissection (33). Our model was adapted from a study  
254 showing that BAPN and Ang II administration in C57Bl/6J mice without any specific genetic

Zalghout et al.

255 background, develop 49% of AAA and 38% of TAA mostly in the ascending part of the aorta  
256 (23). However, our Sdc-1<sup>+/+</sup> C57Bl/6J mice did not develop any AAA and almost all of the TAA  
257 were found in the descending aorta, at the typical site of B dissection and not distal as found by  
258 others (23). The observed differences between these results can be explained by the different age  
259 of the mice at the beginning of the experiment (8 vs. 3 weeks), the route of BAPN administration  
260 (subcutaneous vs. intraperitoneal), the duration of Ang II treatment (6 vs. 4 weeks), or the mouse  
261 background (Sdc1<sup>+/+</sup> from heterozygous mating vs commercially available mice).

262 Our results indicate that Sdc-1 is not involved in the incidence of descending TAA neither in the  
263 risk of rupture in our model. However, Sdc-1 deficiency has been reported to exacerbate AAA  
264 formation and rupture vulnerability in two mice models of abdominal aneurysms (22). We  
265 observe similar findings as AAA was observed only in Sdc-1<sup>-/-</sup> mice and not in the Sdc-1<sup>+/+</sup> mice,  
266 28 days after Ang II infusion. The fact that Sdc-1 was not involved in the extent of aortic  
267 dilatation, elastin degradation or collagen deposition in TAA in our model suggests that Sdc-1  
268 may have a more potent effect on ECM remodeling in abdominal rather than in thoracic aorta  
269 given their different structural and mechanical characteristics (34,35). The differences in the  
270 number of lamellar units, elastin and collagen content, proteinase system, and tension forces  
271 contribute to distinctive vascular remodeling at thoracic or abdominal sites (reviewed in (35)).  
272 Moreover, the inflammatory response is amplified in AAA compared to TAA (36), increasing  
273 the protease activity and MMPs production. It is worth to mention that PGs distribution is  
274 heterogeneous throughout the aorta providing a mechanism for regional dependent adaptation to  
275 variable hemodynamic stresses (37). More interestingly, the regulation of PGs has been shown to  
276 be distinct in the two types of the disease. For instance, aggrecan and versican accumulate in  
277 human ascending TAA (9), whereas proteomic analysis of AAA samples showed a reduced

Zalghout et al.

278 abundance of these PGs in comparison to healthy samples (38). Therefore, it would not be  
279 surprising that a single PG performs a distinct function specific to the site its of expression.

280 Notably, PGs display differential expression depending on the age of the individual (in mice or  
281 humans) and the severity of the disease (9,39–41). Examining the regulation of Sdc-1 in early  
282 human stages of TAA development is likely unachievable. We assumed that 3 days and 28 days  
283 of Ang II treatment corresponded to early and late stage of aneurysm, respectively. However,  
284 rupture (late stage of aneurysm) was observed all along the experimental protocol, even 24h after  
285 Ang II infusion. Thus, the used model did not permit us to study a possible contribution of this  
286 PG in early stages of the disease.

287 As observed for the human TAA samples, Sdc-1 protein expression increased in mice TAA  
288 compared to healthy aortas at both time points. The observed over expression in the media and  
289 adventitial layers of TAA aortas 3 days after Ang II treatment should correspond to both SMC  
290 and leukocyte expression. Indeed 28 days after Ang II infusion, Sdc-1 overexpression was  
291 observed only in the media and not the adventitia of TAA aortas, in concordance with the  
292 observation of decreased leukocytes infiltration at this time point.

293 We observed an infiltration of neutrophils localized mainly in the adventitia, in borders of the  
294 false channel and in dissected media in TAA aortas 3 days after Ang II infusion most likely  
295 because Ang II as a vasopressor, is a potent stimulant of neutrophils recruitment (42,43).  
296 Neutrophil infiltration was previously reported to be in intima following 24h of Ang II infusion  
297 (44). Our data showed that after a longer time of Ang II infusion (3 days), which corresponds to  
298 a more advanced stage of aneurysm, neutrophil infiltration took place in the media where  
299 dissection was observed and in the adventitia. However, these neutrophils almost disappeared 28

Zalghout et al.

300 days after Ang II treatment, corresponding possibly to a switch from an acute to a chronic  
301 inflammatory phase.

302 Despite the findings that neutrophil Sdc-1 reduces neutrophil adhesion to the endothelium (15)  
303 and that Sdc-1 mediates neutrophils resolution by chemokines clearance (28), our data showed  
304 that Sdc-1 does not play a role in neutrophil recruitment in our model, since no difference was  
305 observed between Sdc-1<sup>+/+</sup> or Sdc-1<sup>-/-</sup> TA aortas. More investigations are still required to identify  
306 the identity of PGs present in the distinct types of thoracic aneurysm. The impact of pooled  
307 PGs/GAGs on medial degeneration could be either a global effect generated by all accumulated  
308 PGs, or specific where each PG by itself exerts a particular role during TAA development. A  
309 process of compensation (or redundancy) displayed by other PG expression in the present model  
310 could explain the absence of Sdc-1 specific effect, as it has been reported in the context of  
311 atherosclerosis between biglycan and perlecan for Apo-B retention (45).

## 312 **Conclusion**

313 This study reports an overexpression of Sdc-1 in human TAA compared to healthy aortas  
314 suggesting that it can serve as a biomarker for this pathology. The underlying mechanism  
315 relevant to this alteration remains to be determined. The mouse model used induced mostly  
316 descending TAA, and Sdc-1 was not involved in its incidence, neither in its histological  
317 characteristics. An implication of Sdc-1 in TAA (ascending or descending) could be revealed  
318 from studies in other TAA mouse models possibly associated with ECM genes deficiency as it  
319 organizes the ECM and interacts with its proteins. Interestingly, we observed that Sdc-1 tends to  
320 protect from AAA, in agreement with a previous report (22). Deciphering the protective

Zalghout et al.

321 molecular function of Sdc-1 in AAA, and its possible role in TAA, could perhaps aid in the  
322 comprehension of its clinical relevance.

323

#### 324 **Ethics Statement**

325 Studies involving human participants were in agreement with the principles defined in the  
326 Declaration of Helsinki. Written informed consents were obtained from all individual  
327 participants (or family members) included in the study with Ethics Committee approval from  
328 INSERM and AP-HP (CEERB du GHU Nord) Institutional review board (CPP 05 04 32,  
329 Ambroise Paré, Boulogne, France, April 2005; updated in March 2008). Mice experiments were  
330 conducted according to the institutional guidelines for the care and use of animal research and  
331 the ARRIVE guidelines and in compliance with the Animal Care and Use Committee (2011-  
332 14/69-0035). The protocol was approved by the French MESRI (Ministère de l'Enseignement  
333 Supérieur de la Recherche et de l'Innovation # 8855)

#### 334 **Author Contributions**

335 BR conceived and designed the study; SZ performed most of the experiments; BR, SV and SJ  
336 performed some of human and/or mice experiments; MCB, VA, EH, YB, BR and SZ analysed  
337 the data; SZ wrote the manuscript with support from BR; MCB, VA, YB, OO, NC, EH, and BB  
338 supervised the research and provided intellectual discussion and editorial advice. All authors  
339 contributed to manuscript revision and approved the submitted version.

#### 340 **Conflict of Interest**



Zalghout et al.

341 The authors declare that the research was conducted in the absence of any commercial or  
342 financial relationships that could be construed as a potential conflict of interest.

### 343 **Acknowledgments**

344 We thank Thierry Dubois and Benoit Ho-Tin-Noé for the critical reading of the manuscript and  
345 helpful advices.

### 346 **Funding**

347 This work was funded by INSERM and Sorbonne Paris Nord University. Sara Zalghout was  
348 funded by the Lebanese University, AZM Saade association, INSERM and Sorbonne Paris Nord  
349 University.

350

351

352

353

354

355

356

357

358

359 **REFERENCES**

Zalghout et al.

- 360 1. Olsson Christian, Thelin Stefan, Ståhle Elisabeth, Ekblom Anders, Granath Fredrik. Thoracic Aortic  
361 Aneurysm and Dissection. *Circulation* (2006) 114:2611–2618.  
362 doi:10.1161/CIRCULATIONAHA.106.630400
- 363 2. Kuzmik GA, Sang AX, Elefteriades JA. Natural history of thoracic aortic aneurysms. *Journal of*  
364 *Vascular Surgery* (2012) 56:565–571. doi:10.1016/j.jvs.2012.04.053
- 365 3. Elefteriades JA, Botta DM. Indications for the Treatment of Thoracic Aortic Aneurysms. *Surgical*  
366 *Clinics of North America* (2009) 89:845–867. doi:10.1016/j.suc.2009.06.005
- 367 4. Shen Ying H., Lu Hong S., LeMaire Scott A., Daugherty Alan. Unfolding the Story of Proteoglycan  
368 Accumulation in Thoracic Aortic Aneurysm and Dissection. *Arteriosclerosis, Thrombosis, and*  
369 *Vascular Biology* (2019) 39:1899–1901. doi:10.1161/ATVBAHA.119.313279
- 370 5. Halushka MK, Angelini A, Bartoloni G, Basso C, Batoroeva L, Bruneval P, Buja LM, Butany J,  
371 d’Amati G, Fallon JT, et al. Consensus statement on surgical pathology of the aorta from the  
372 Society for Cardiovascular Pathology and the Association For European Cardiovascular Pathology:  
373 II. Noninflammatory degenerative diseases — nomenclature and diagnostic criteria. *Cardiovascular*  
374 *Pathology* (2016) 25:247–257. doi:10.1016/j.carpath.2016.03.002
- 375 6. Schlatmann TJM, Becker AE. Pathogenesis of dissecting aneurysm of aorta: Comparative  
376 histopathologic study of significance of medial changes. *American Journal of Cardiology* (1977)  
377 39:21–26. doi:10.1016/S0002-9149(77)80005-2
- 378 7. Humphrey JD. Possible Mechanical Roles of Glycosaminoglycans in Thoracic Aortic Dissection  
379 and Associations with Dysregulated TGF- $\beta$ . *J Vasc Res* (2013) 50:1–10. doi:10.1159/000342436
- 380 8. Roccabianca S, Ateshian GA, Humphrey JD. Biomechanical roles of medial pooling of  
381 glycosaminoglycans in thoracic aortic dissection. *Biomech Model Mechanobiol* (2014) 13:13–25.  
382 doi:10.1007/s10237-013-0482-3
- 383 9. Cikach FS, Koch CD, Mead TJ, Galatioto J, Willard BB, Emerton KB, Eagleton MJ, Blackstone  
384 EH, Ramirez F, Roselli EE, et al. Massive aggrecan and versican accumulation in thoracic aortic  
385 aneurysm and dissection. *JCI Insight* 3: doi:10.1172/jci.insight.97167
- 386 10. Cattell MA, Hasleton PS, Anderson JC. Glycosaminoglycan content is increased in dissecting  
387 aneurysms of human thoracic aorta. *Clin Chim Acta* (1994) 226:29–46. doi:10.1016/0009-  
388 8981(94)90100-7
- 389 11. Raines EW. The extracellular matrix can regulate vascular cell migration, proliferation, and  
390 survival: relationships to vascular disease. *Int J Exp Pathol* (2000) 81:173–182. doi:10.1046/j.1365-  
391 2613.2000.00155.x
- 392 12. Fukai N, Kenagy RD, Chen L, Gao L, Daum G, Clowes AW. Syndecan-1: An inhibitor of arterial  
393 smooth muscle cell growth and intimal hyperplasia. *Arterioscler Thromb Vasc Biol* (2009) 29:1356–  
394 1362. doi:10.1161/ATVBAHA.109.190132
- 395 13. Götte M, Jousseaume AM, Klein C, Andre P, Wagner DD, Hinkes MT, Kirchhof B, Adamis AP,  
396 Bernfield M. Role of Syndecan-1 in Leukocyte–Endothelial Interactions in the Ocular Vasculature.  
397 *Invest Ophthalmol Vis Sci* (2002) 43:1135–1141.

Zalghout et al.

- 398 14. Pei S, Zheng D, Wang Z, Hu X, Pan S, Wang H. Elevated soluble syndecan-1 levels in  
399 neuromyelitis optica are associated with disease severity. *Cytokine* (2018) 111:140–145.  
400 doi:10.1016/j.cyto.2018.08.017
- 401 15. Masouleh BK, Dam GBT, Wild MK, Seelige R, Vlag J van der, Rops AL, Echtermeyer FG,  
402 Vestweber D, Kuppevelt TH van, Kiesel L, et al. Role of the Heparan Sulfate Proteoglycan  
403 Syndecan-1 (CD138) in Delayed-Type Hypersensitivity. *The Journal of Immunology* (2009)  
404 182:4985–4993. doi:10.4049/jimmunol.0800574
- 405 16. Stepp MA, Gibson HE, Gala PH, Iglesia DDS, Pajooohesh-Ganji A, Pal-Ghosh S, Brown M, Aquino  
406 C, Schwartz AM, Goldberger O, et al. Defects in keratinocyte activation during wound healing in  
407 the syndecan-1-deficient mouse. *Journal of Cell Science* (2002) 115:4517–4531.  
408 doi:10.1242/jcs.00128
- 409 17. Vanhoutte Davy, Schellings Mark W.M., Götte Martin, Swinnen Melissa, Herias Veronica, Wild  
410 Martin K., Vestweber Dietmar, Chorianopoulos Emmanuel, Cortés Víctor, Rigotti Attilio, et al.  
411 Increased Expression of Syndecan-1 Protects Against Cardiac Dilatation and Dysfunction After  
412 Myocardial Infarction. *Circulation* (2007) 115:475–482.  
413 doi:10.1161/CIRCULATIONAHA.106.644609
- 414 18. Xian X, Gopal S, Couchman J. Syndecans as receptors and organizers of the extracellular matrix.  
415 *Cell and tissue research* (2009) 339:31–46. doi:10.1007/s00441-009-0829-3
- 416 19. Chaterji S, Lam CH, Ho DS, Proske DC, Baker AB. Syndecan-1 regulates vascular smooth muscle  
417 cell phenotype. *PLoS One* (2014) 9:e89824. doi:10.1371/journal.pone.0089824
- 418 20. Alexopoulou AN, Multhaupt HAB, Couchman JR. Syndecans in wound healing, inflammation and  
419 vascular biology. *Int J Biochem Cell Biol* (2007) 39:505–528. doi:10.1016/j.biocel.2006.10.014
- 420 21. Rhodes JM, Simons M. The extracellular matrix and blood vessel formation: not just a scaffold. *J*  
421 *Cell Mol Med* (2007) 11:176–205. doi:10.1111/j.1582-4934.2007.00031.x
- 422 22. Xiao J, Angsana J, Wen J, Smith SV, Park PW, Ford ML, Haller CA, Chaikof EL. Syndecan-1  
423 Displays a Protective Role in Aortic Aneurysm Formation by Modulating T Cell-Mediated  
424 Responses. *Arterioscler Thromb Vasc Biol* (2012) 32:386–396.  
425 doi:10.1161/ATVBAHA.111.242198
- 426 23. Kanematsu Y, Kanematsu M, Kurihara C, Tsou T-L, Nuki Y, Liang EI, Makino H, Hashimoto T.  
427 Pharmacologically Induced Thoracic and Abdominal Aortic Aneurysms in Mice. *Hypertension*  
428 (2010) 55:1267–1274. doi:10.1161/HYPERTENSIONAHA.109.140558
- 429 24. Pisano C, Balistreri CR, Ricasoli A, Ruvolo G. Cardiovascular Disease in Ageing: An Overview on  
430 Thoracic Aortic Aneurysm as an Emerging Inflammatory Disease. *Mediators Inflamm* (2017)  
431 2017:1274034. doi:10.1155/2017/1274034
- 432 25. Dinesh NEH, Reinhardt DP. Inflammation in thoracic aortic aneurysms. *Herz* (2019) 44:138–146.  
433 doi:10.1007/s00059-019-4786-7
- 434 26. Malecki C, Hambly BD, Jeremy RW, Robertson EN. The Role of Inflammation and  
435 Myeloperoxidase-Related Oxidative Stress in the Pathogenesis of Genetically Triggered Thoracic  
436 Aortic Aneurysms. *Int J Mol Sci* (2020) 21:7678. doi:10.3390/ijms21207678

Zalghout et al.

- 437 27. Angsana J, Chen J, Smith S, Xiao J, Wen J, Liu L, Haller CA, Chaikof EL. Syndecan-1 Modulates  
438 the Motility and Resolution Responses of Macrophages. *Arteriosclerosis, Thrombosis, and Vascular*  
439 *Biology* (2015) 35:332–340. doi:10.1161/ATVBAHA.114.304720
- 440 28. Hayashida K, Parks WC, Park PW. Syndecan-1 shedding facilitates the resolution of neutrophilic  
441 inflammation by removing sequestered CXC chemokines. *Blood* (2009) 114:3033–3043.  
442 doi:10.1182/blood-2009-02-204966
- 443 29. Nikkari ST, Järveläinen HT, Wight TN, Ferguson M, Clowes AW. Smooth muscle cell expression  
444 of extracellular matrix genes after arterial injury. *Am J Pathol* (1994) 144:1348–1356.
- 445 30. Ntika S, Tracy LM, Franco-Cereceda A, Björck HM, Krizhanovskii C. Syndecan-1 Expression Is  
446 Increased in the Aortic Wall of Patients with Type 2 Diabetes but Is Unrelated to Elevated Fasting  
447 Plasma Glucagon-Like Peptide-1. *Biomedicines* (2021) 9:697. doi:10.3390/biomedicines9060697
- 448 31. Julien MA, Haller CA, Wang P, Wen J, Chaikof EL. Mechanical strain induces a persistent  
449 upregulation of syndecan-1 expression in smooth muscle cells. *J Cell Physiol* (2007) 211:167–173.  
450 doi:10.1002/jcp.20927
- 451 32. Ebersson LS, Sanchez PA, Majeed BA, Tawinwung S, Secomb TW, Larson DF. Effect of Lysyl  
452 Oxidase Inhibition on Angiotensin II-Induced Arterial Hypertension, Remodeling, and Stiffness.  
453 *PLOS ONE* (2015) 10:e0124013. doi:10.1371/journal.pone.0124013
- 454 33. Ren W, Liu Y, Wang X, Jia L, Piao C, Lan F, Du J.  $\beta$ -Aminopropionitrile monofumarate induces  
455 thoracic aortic dissection in C57BL/6 mice. *Sci Rep* (2016) 6: doi:10.1038/srep28149
- 456 34. Jana S, Hu M, Shen M, Kassiri Z. Extracellular matrix, regional heterogeneity of the aorta, and  
457 aortic aneurysm. *Exp Mol Med* (2019) 51:1–15. doi:10.1038/s12276-019-0286-3
- 458 35. Ruddy JM, Jones JA, Spinale FG, Ikonomidis JS. Regional Heterogeneity within the Aorta:  
459 Relevance to Aneurysm Disease. *J Thorac Cardiovasc Surg* (2008) 136:1123–1130.  
460 doi:10.1016/j.jtcvs.2008.06.027
- 461 36. Tang PCY, Yakimov AO, Teesdale MA, Coady MA, Dardik A, Elefteriades JA, Tellides G.  
462 Transmural inflammation by interferon-gamma-producing T cells correlates with outward vascular  
463 remodeling and intimal expansion of ascending thoracic aortic aneurysms. *FASEB J* (2005)  
464 19:1528–1530. doi:10.1096/fj.05-3671fje
- 465 37. Azeloglu EU, Albro MB, Thimmappa VA, Ateshian GA, Costa KD. Heterogeneous transmural  
466 proteoglycan distribution provides a mechanism for regulating residual stresses in the aorta.  
467 *American Journal of Physiology-Heart and Circulatory Physiology* (2008) 294:H1197–H1205.  
468 doi:10.1152/ajpheart.01027.2007
- 469 38. Didangelos A, Yin X, Mandal K, Saje A, Smith A, Xu Q, Jahangiri M, Mayr M. Extracellular  
470 Matrix Composition and Remodeling in Human Abdominal Aortic Aneurysms: A Proteomics  
471 Approach. *Mol Cell Proteomics* (2011) 10:M111.008128. doi:10.1074/mcp.M111.008128
- 472 39. Wen J, Wang P, Smith SV, Haller CA, Chaikof EL. Syndecans are differentially expressed during  
473 the course of aortic aneurysm formation. *Journal of Vascular Surgery* (2007) 46:1014–1025.  
474 doi:10.1016/j.jvs.2007.06.022

Zalghout et al.

- 475 40. Tovar AMF, Cesar DCF, Leta GC, Mourão PAS. Age-Related Changes in Populations of Aortic  
476 Glycosaminoglycans: Species With Low Affinity for Plasma Low-Density Lipoproteins, and Not  
477 Species With High Affinity, Are Preferentially Affected. *ATVB* (1998) 18:604–614.  
478 doi:10.1161/01.ATV.18.4.604
- 479 41. Yasmin, Maskari RA, McEniery CM, Cleary SE, Li Y, Siew K, Figg NL, Khir AW, Cockcroft JR,  
480 Wilkinson IB, et al. The matrix proteins aggrecan and fibulin-1 play a key role in determining aortic  
481 stiffness. *Sci Rep* (2018) 8:8550. doi:10.1038/s41598-018-25851-5
- 482 42. Nabah YNA, Losada M, Estellés R, Mateo T, Company C, Piqueras L, Lopez-Gines C, Sarau H,  
483 Cortijo J, Morcillo EJ, et al. CXCR2 Blockade Impairs Angiotensin II–Induced CC Chemokine  
484 Synthesis and Mononuclear Leukocyte Infiltration. *Arteriosclerosis, Thrombosis, and Vascular  
485 Biology* (2007) 27:2370–2376. doi:10.1161/ATVBAHA.107.147009
- 486 43. Arndt PG, Young SK, Poch KR, Nick JA, Falk S, Schrier RW, Worthen GS. Systemic Inhibition of  
487 the Angiotensin-Converting Enzyme Limits Lipopolysaccharide-Induced Lung Neutrophil  
488 Recruitment through Both Bradykinin and Angiotensin II-Regulated Pathways. *The Journal of  
489 Immunology* (2006) 177:7233–7241. doi:10.4049/jimmunol.177.10.7233
- 490 44. Kurihara Tomohiro, Shimizu-Hirota Ryoko, Shimoda Masayuki, Adachi Takeshi, Shimizu  
491 Hideyuki, Weiss Stephen J., Itoh Hiroshi, Hori Shingo, Aikawa Naoki, Okada Yasunori.  
492 Neutrophil-Derived Matrix Metalloproteinase 9 Triggers Acute Aortic Dissection. *Circulation*  
493 (2012) 126:3070–3080. doi:10.1161/CIRCULATIONAHA.112.097097
- 494 45. Tang T, Thompson JC, Wilson PG, Yoder MH, Müller J, Fischer JW, Jon Williams K, Tannock  
495 LR. Biglycan deficiency: increased aortic aneurysm formation and lack of atheroprotection. *J Mol  
496 Cell Cardiol* (2014) 75:174–180. doi:10.1016/j.yjmcc.2014.07.014

497

Zalghout et al.

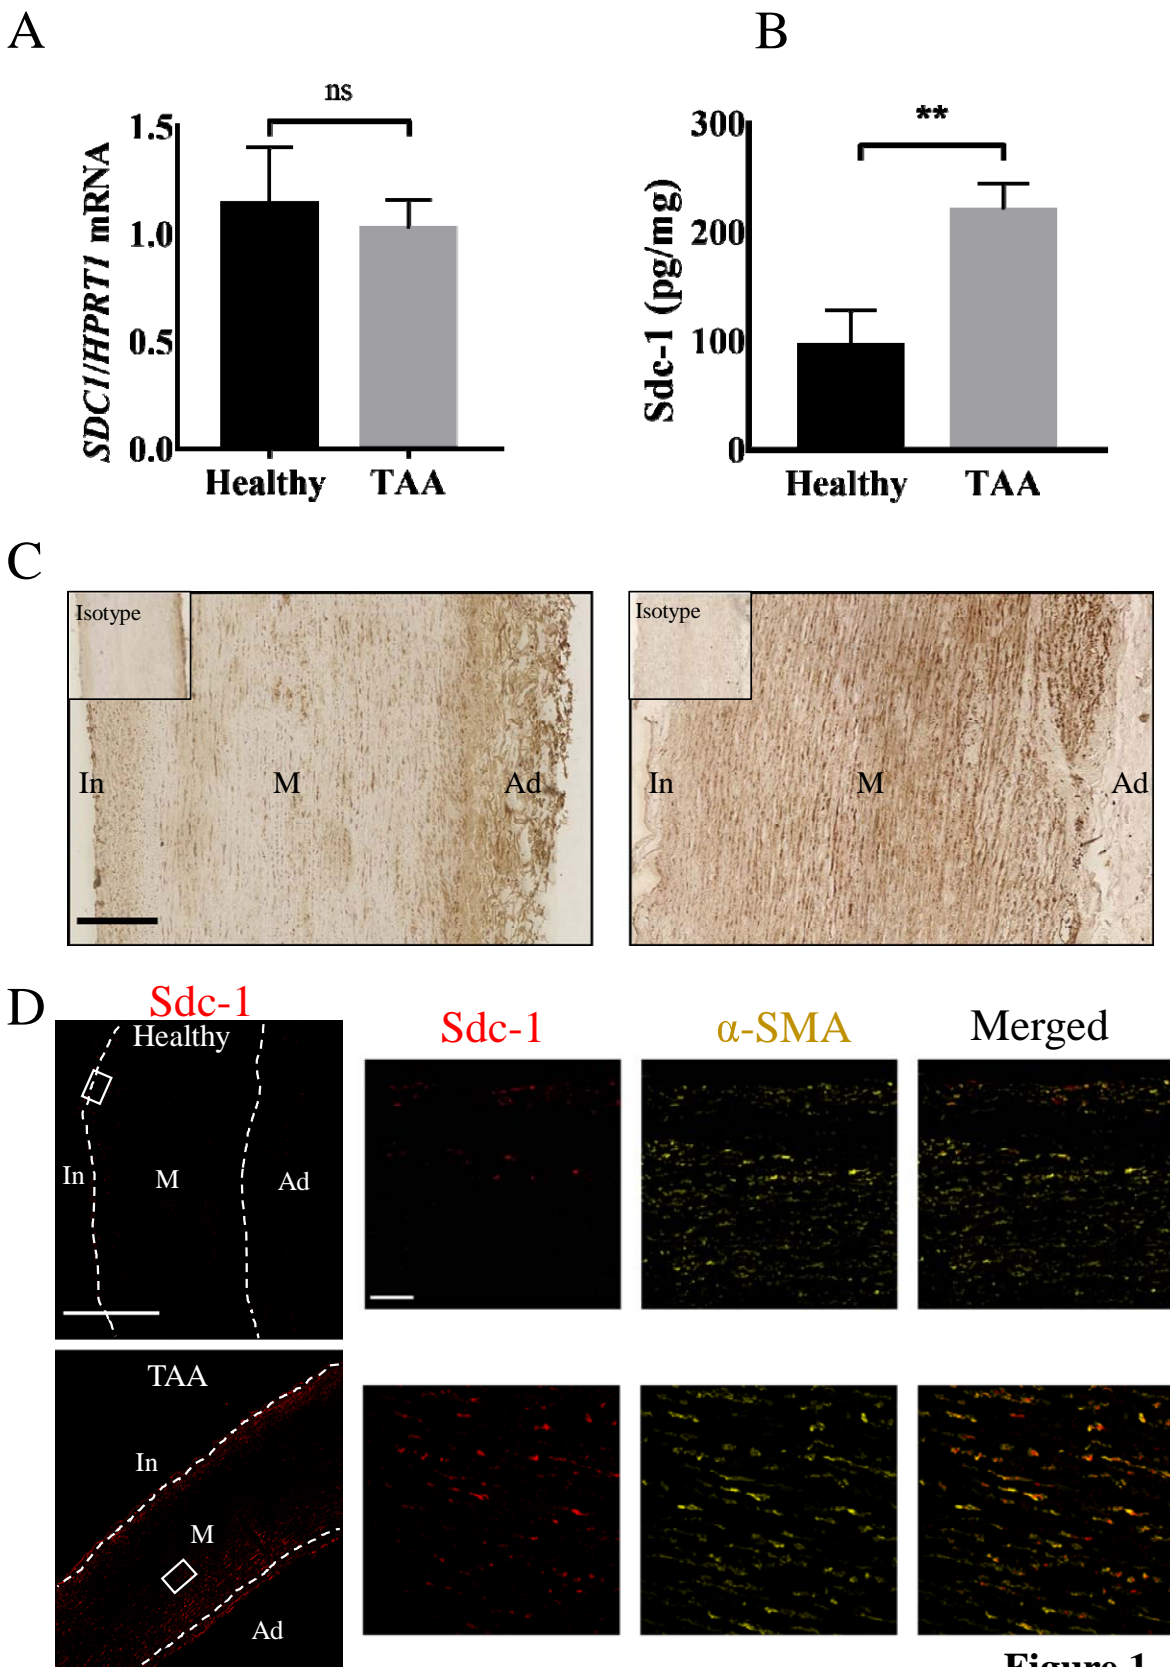

Zalghout et al.

498 **Figure 1. Sdc-1 protein level is increased in human TAA media compared to healthy ones**  
499 **and is expressed by SMCs**

500 **(A)** mRNA level of *SDCI* was measured by q-PCR and normalized to Hypoxanthine-guanine  
501 phosphoribosyltransferase (HPRT) in healthy ( $n=6$ ) and TAA ( $n=14$ ) human thoracic aortic  
502 media. **(B)** The concentration of Sdc-1 protein in human aortic media was assessed by ELISA  
503 from healthy ( $n=8$ ) or TAA ( $n=16$ ) donors. **(C)** Representative images of Sdc-1 staining by  
504 immunohistochemistry in human healthy and TAA aortas. Staining with an isotype control was  
505 performed as a negative control and shown on the top left of images. Scale bar corresponds to  
506 200 $\mu$ m. **(D)** Representative immunofluorescence images of Sdc-1 (red) and  $\alpha$ -SMA (yellow) co-  
507 staining in human healthy (top images) or TAA (bottom images) aortas. The dashed lines  
508 indicate the separation of the different layers: In: intima, M: media, Ad: adventitia. Scale bar  
509 corresponds to 400 $\mu$ m for the non-magnified images and 50 $\mu$ m to the magnified ones. **(A, B)**  
510 Data are presented as mean  $\pm$  SEM and *P* values were calculated using two-tailed Mann-Whitney  
511 test; \*\* corresponds to *p* value <0.01, ns: not significant.

Zalghout et al.

**A**

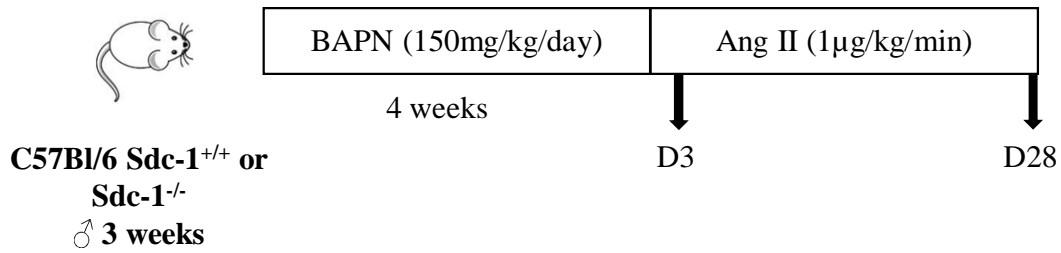

**B**

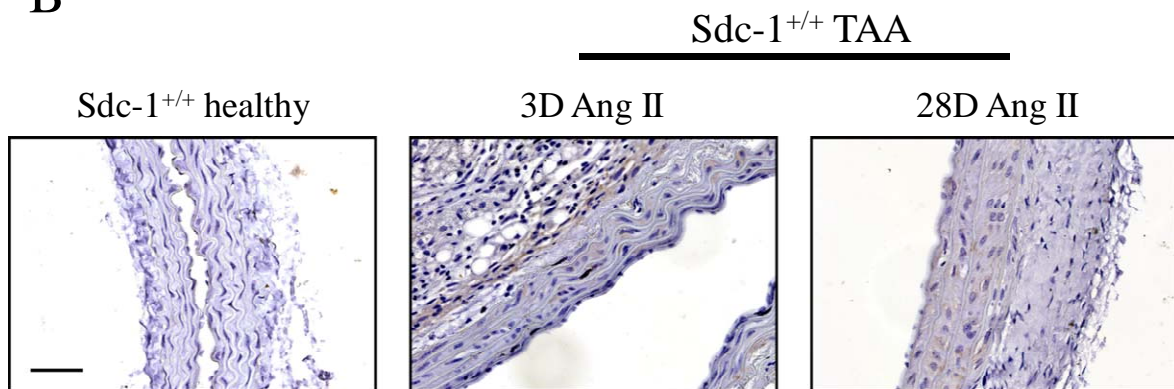

**Figure 2**



Zalghout et al.

512 **Figure 2. Sdc-1 is overexpressed in TAA compared to healthy aortas in the BAPN/AngII aneurysm**

513 **mouse model**

514 **(A)** Experimental model used. Sdc-1<sup>+/+</sup> or Sdc-1<sup>-/-</sup> male C57Bl/6J mice of 3 weeks old received  
515 intraperitoneal injection of  $\beta$ -amino propionitrile (BAPN) for 4 weeks followed by subcutaneous  
516 infusion of angiotensin II (Ang II) by pump implantation for 3 (D3) or 28 (D28) days, then  
517 sacrificed. **(B)** Representative images of Sdc-1 immunostaining in healthy ( $n=3$ ) and TAA aortas  
518 after 3 ( $n=2$ ) or 28 days ( $n=3$ ) of Ang II treatment. Scale bar corresponds to 50 $\mu$ m.

Zalghout et al.

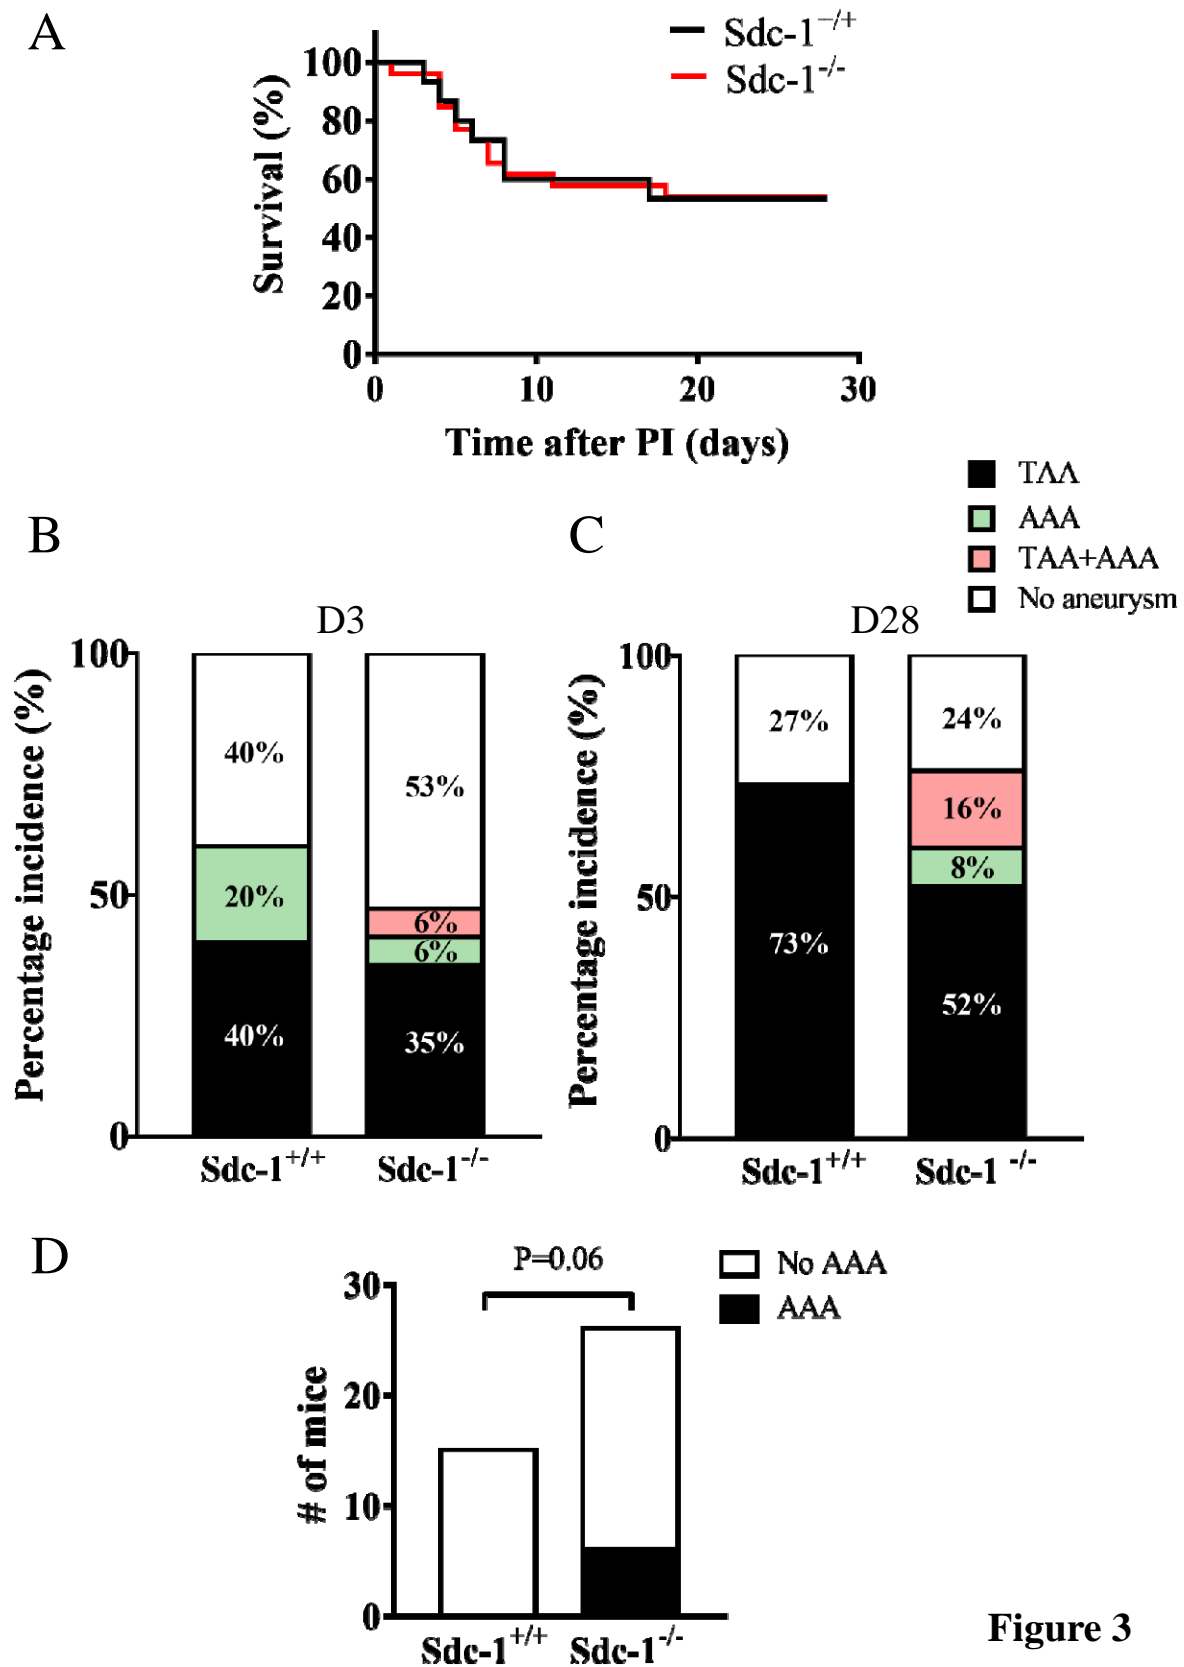

Figure 3

Zalghout et al.

519 **Figure 3. Sdc-1 is dispensable for TAA incidence or rupture but tends to protect from AAA**  
520 **development in mice**

521 (A) Survival rate of mice after 28 days following Ang II infusion Gehan-Breslow-Wilcoxon test.  
522 PI : pump implantation. Sdc-1<sup>+/+</sup> :  $n=15$ , Sdc-1<sup>-/-</sup> :  $n= 26$ . ns, non-significant. (B, C) Percentage  
523 of TAA or AAA incidence in Sdc-1<sup>+/+</sup> or Sdc-1<sup>-/-</sup> mice for 3 (B) or 28 days (C) of Ang II  
524 treatment. (D) AAA incidence in mice treated with Ang II for 28 days. Fisher's exact test. (B)  
525 Sdc-1<sup>+/+</sup>:  $n=5$ , Sdc-1<sup>-/-</sup>:  $n= 17$ . (C, D) Sdc-1<sup>+/+</sup>:  $n=15$ , Sdc-1<sup>-/-</sup>:  $n= 26$ .

Zalghout et al.

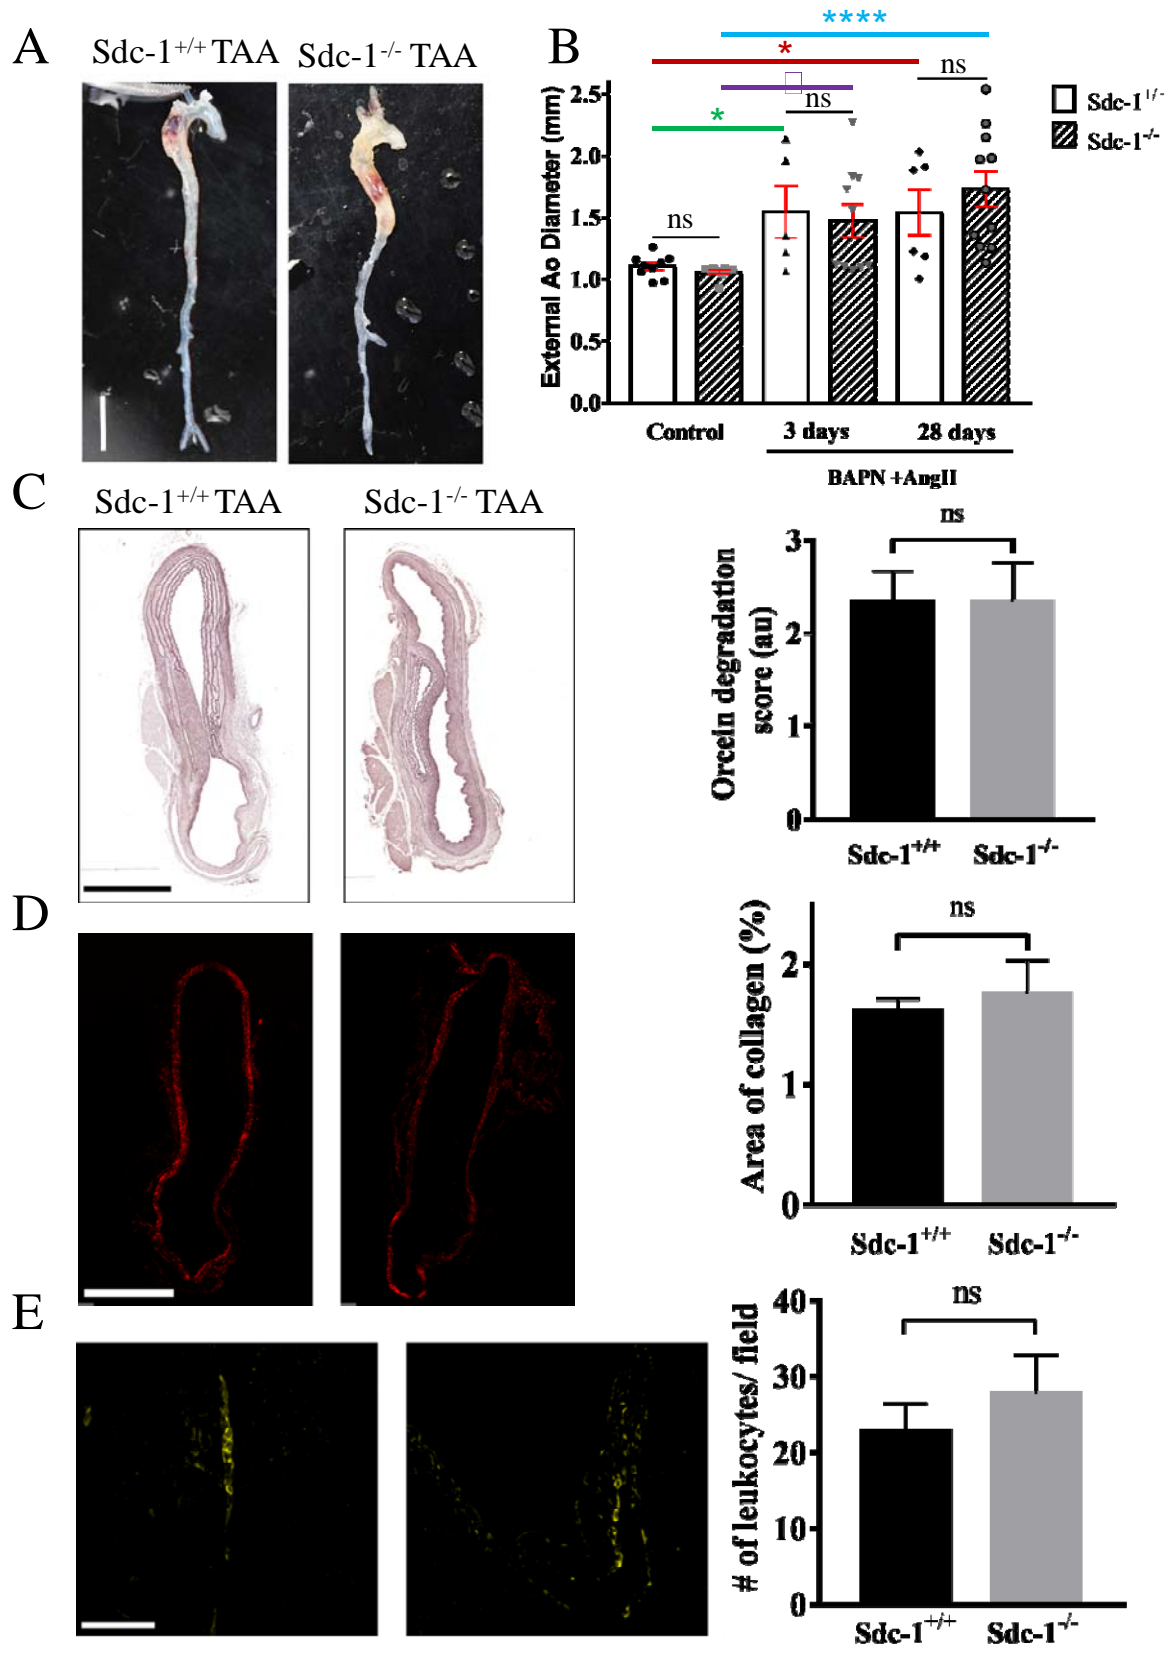

Figure 4

Zalghout et al.

526 **Figure 4. Sdc-1 deficiency does not alter the extent of aortic dilatation, ECM remodeling,**  
527 **or leukocyte recruitment in descending TAA in mice**

528 **(A)** Macroscopic images of developed TAA in Sdc-1<sup>+/+</sup> or Sdc-1<sup>-/-</sup> mice. Scale bar corresponds to  
529 5 mm. **(B)** Measurement of external descending thoracic diameter in Sdc-1<sup>+/+</sup> and Sdc-1<sup>-/-</sup> mice  
530 that received BAPN and Ang II for 3 or 28 days, and control (sham) mice. Aorta with a diameter  
531  $\geq 1.5$  mm was considered as an aorta that developed TAA. Sdc-1<sup>+/+</sup> or Sdc-1<sup>-/-</sup> ctrl:  $n = 9$  for both,  
532 Sdc-1<sup>+/+</sup> and Sdc-1<sup>-/-</sup> 3 days:  $n = 5$  and  $n = 10$  respectively, Sdc-1<sup>+/+</sup> and Sdc-1<sup>-/-</sup> 28 days:  $n = 6$  and  
533  $n = 11$  respectively. **(C)** Elastin degradation. Representative images of orcein staining for Sdc-1<sup>+/+</sup>  
534 or Sdc-1<sup>-/-</sup> TAA aortas after 28 days following Ang II treatment. Histological sections were  
535 evaluated for elastin degradation by giving an approximate score (scale from 0 to 4: 0  
536 corresponding to no degradation and 4 to maximal degradation). Sdc-1<sup>+/+</sup>:  $n = 3$ , Sdc-1<sup>-/-</sup>:  $n = 6$   
537 **(D)** Collagen deposition. Representative images of Sirius red staining (visualized under polarized  
538 light) and its quantification by image J software.  $P$  values were calculated using two-tailed  
539 Mann-Whitney test. **(C, D)** Scale bar corresponds to 500 $\mu$ m. **(E)** Representative images of  
540 immunofluorescence staining of leukocytes (CD45) in TAA aortas after 28 days of Ang II  
541 infusion and its quantification (to the right) by Image J software. Scale bar corresponds to 50 $\mu$ m.  
542 **(D, E)** Sdc-1<sup>+/+</sup>:  $n = 3$ , Sdc-1<sup>-/-</sup>:  $n = 7$ . **(B, C, D, E)** Data are presented as mean  $\pm$  SEM and  $P$   
543 values were calculated using two-tailed Mann-Whitney test; \*:  $p < 0.05$ ,  $\square$ :  $p < 0.01$ , \*\*\*\*:  $p < 0.0001$ , ns: not significant.
